# Supplementary material for: Loss of hepatocyte growth factor activator inhibitor type 1 participates in metastatic spreading of human pancreatic cancer cells in a mouse orthotopic transplantation model
Source: PubMed Central journal article supplement — Cancer Sci. 2013 Nov 25;105(1):44–51. doi: 10.1111/cas.12306 (PMC4317873; doi:10.1111/cas.12306), 2013-11-25
Supplement: cas0105-0044-sd1.pdf [file cas0105-0044-sd1.pdf]

### Supplemental Table 1. Sequences of siRNAs and RT-PCR primers

| Target                         | siRNA sequences                                                                                                                  |
|--------------------------------|----------------------------------------------------------------------------------------------------------------------------------|
| Human <i>SPINT1</i> (HAI-1)    | 5'-CUGCAAGAGUUUCGUUUAU<br>5'-UUGACGAGCUCCAGCGCAU<br>5'-GAACAACUACCUUCGGGAA<br>5'-ACCCAGAGGACACGGCCAA<br>(a pool of four siRNAs)* |
| Human <i>F2RL1</i> (PAR-2)     | 5'-GCAGAGGUAUUGGGUCAUC<br>5'-GCAAGUAUCCCUCACCUCA<br>5'-GGGAAGCUCUUUGUAAUGU<br>5'-UGGGAGACAUGUUCAAUUA<br>(a pool of four siRNAs)* |
| Human <i>ST14</i> (Matriptase) | 5'-GCGUGUACACAAGGCUCCCUCUGUU                                                                                                     |
| Target                         | Primer sequences**                                                                                                               |
| HGF                            | forward, 5'-TGGGAAATGAGAAATGCAGCCAGC<br>reverse, 5'-CAGTTGTATTGGTGGGTGCTTCAG                                                     |
| c-MET                          | forward, 5'-AACTGGTGTCCCGGATATCA<br>reverse, 5'-TGGCAAGAGCAAAGAATATCG                                                            |
| PAR-2                          | forward, 5'-GGGTTTGCCAAGTAACGGC<br>reverse, 5'-GGGAACCAGATGACAGAGAGG                                                             |
| uPA                            | forward, 5'-GCCATCCCGGACTATACAGA<br>reverse, 5'-AGGCCATTCTCTTCCTTGGT                                                             |

\*: siRNAs pool (ON-TARGETplus SMARTpool siRNA, Thermo Scientific)

\*\* : Primer sequences for HAI-1, HAI-2, matriptase, TMPRSS13, TMPRSS4, prostatic, and GAPDH were described in reference No. 30.
